# Supplementary material
Source: Springer Nature journal article supplement (https://www.springermedizin.de/resource/supplementary/12970_2007_47_MOESM7_ESM.pdf/9594242)

## Testosterone

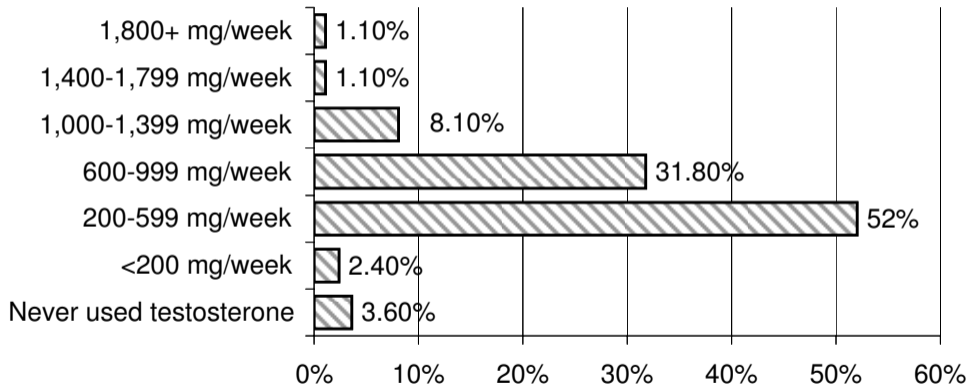

Supplement: MOESM7 [file 9594242]
